# Supplementary material for: Highly efficient direct large-scale stoichiometric aldol reactions catalyzed by a new diamine salt in the presence of water
Source: Royal Society of Chemistry journal article supplement (doi:10.1039/c1cy00318f), 2011-12-05

# Supporting Information

## Copies of $^1\text{H}$ NMR and $^{13}\text{C}$ NMR of Compounds

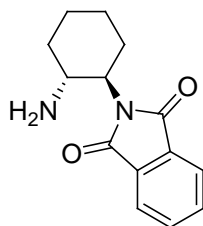

(1R,2R)-N-Phthaloyl-1,2-diaminocyclohexane

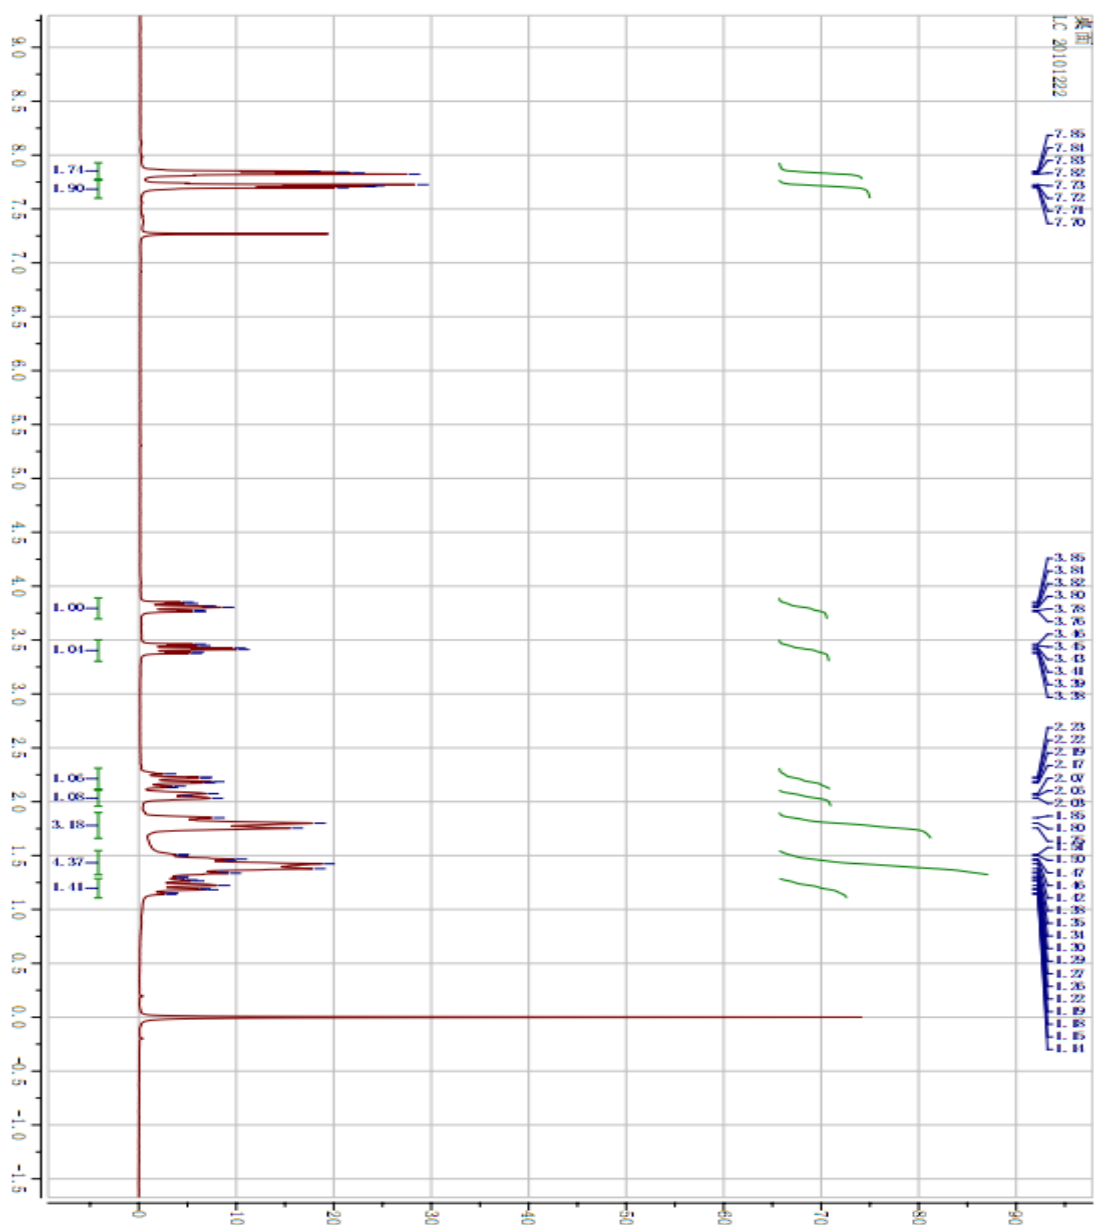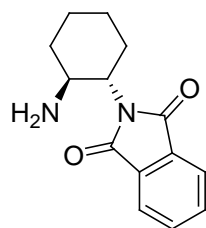

(1R,2R)-N-Phthaloyl-1,2-diaminocyclohexane

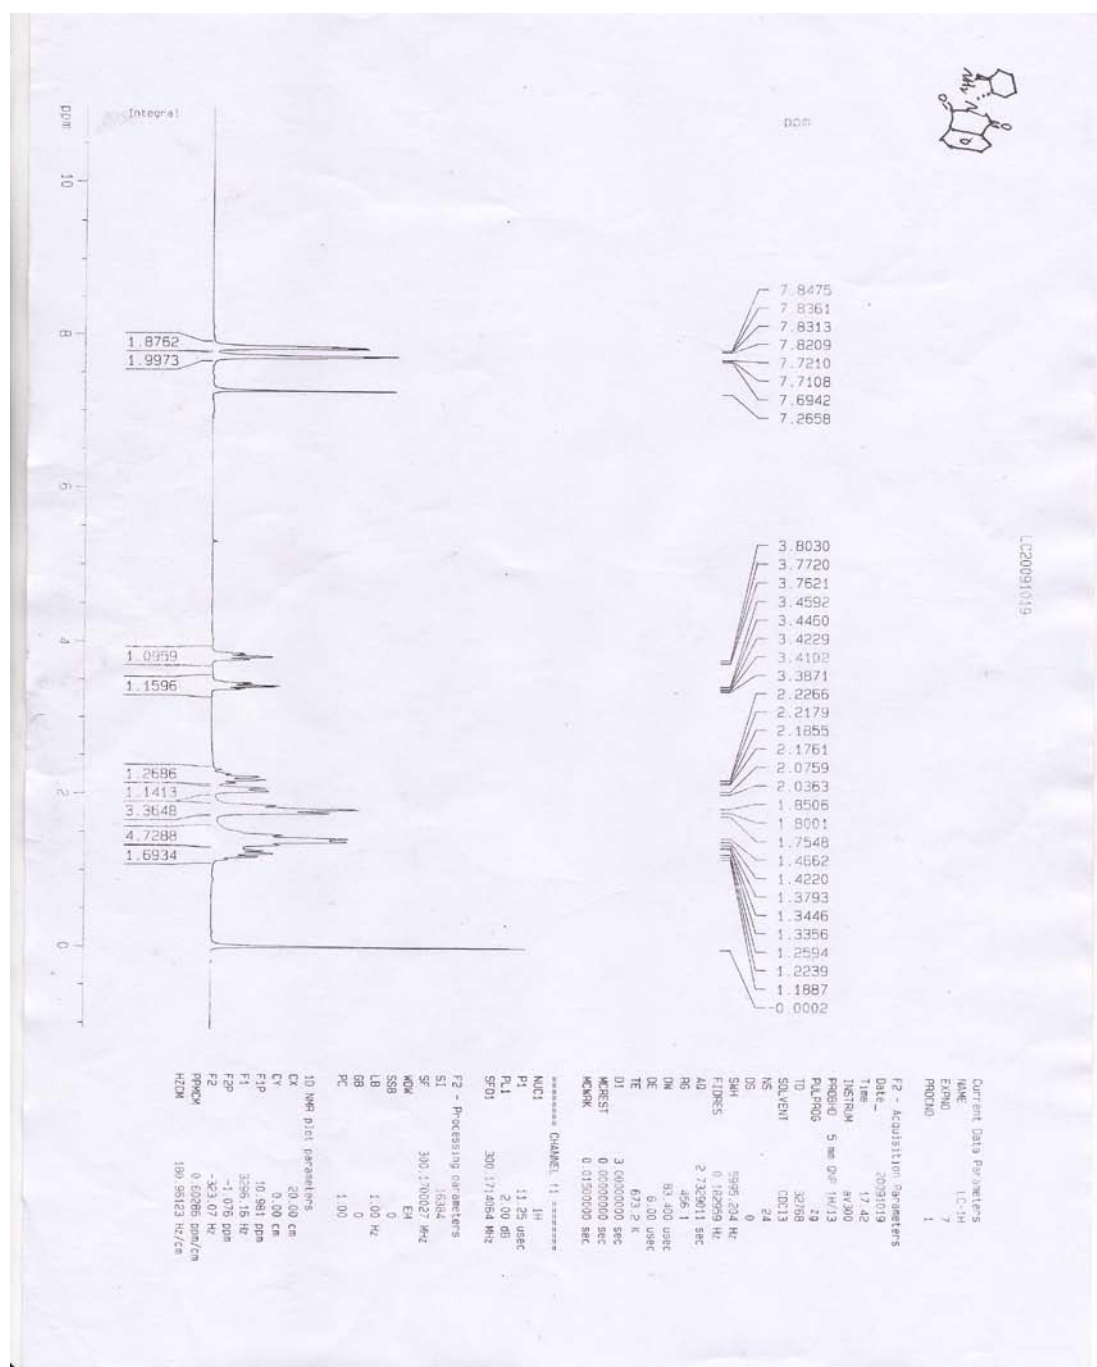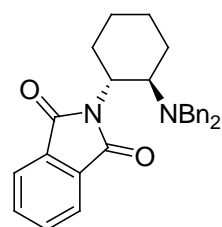

(1R,2R)-N,N-Dibenzyl-N'-phthaloyl-1,2-diaminocyclohexane

LC 20100324 D

- 7.848
- 7.749
- 7.257
- 7.166
- 7.145
- 7.114
- 7.089
- 7.067
- 7.028
- 7.005
- 4.342
- 4.330
- 4.303
- 4.292
- 4.265
- 4.253
- 3.773
- 3.728
- 3.350
- 3.329
- 3.305
- 2.275
- 2.264
- 2.233
- 2.172
- 2.144
- 1.859
- 1.844
- 1.794
- 1.763
- 1.576
- 1.396
- 1.388
- 1.350
- 1.328
- 1.303
- 1.267
- 0.000

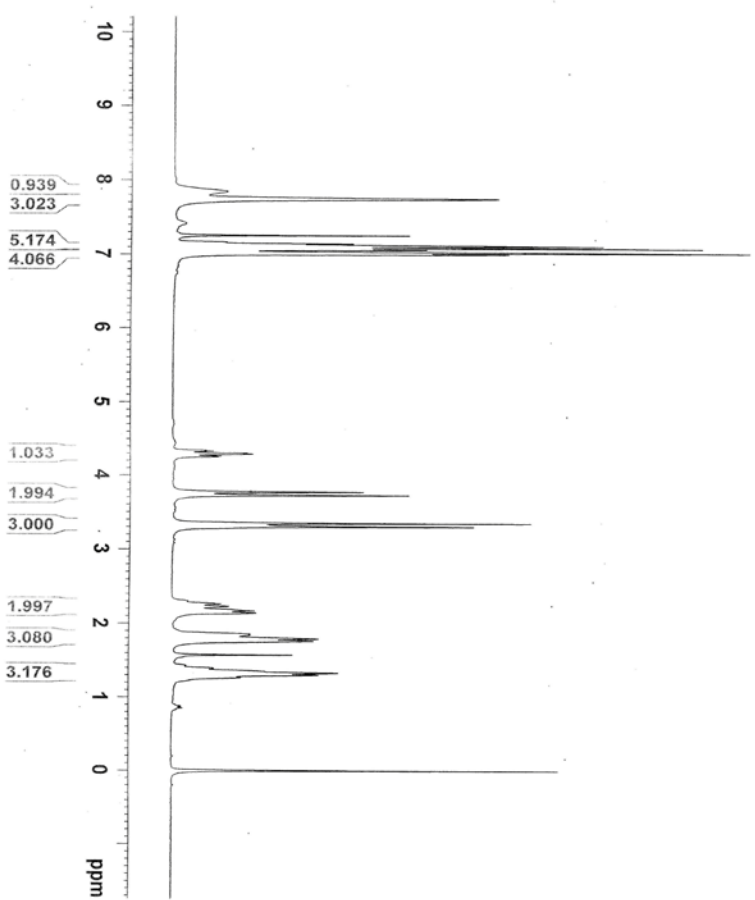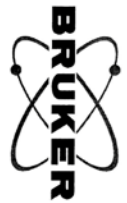

Current Data Parameters  
NAME LC-1H  
EXPNO 24  
PROCNO 1

F2 - Acquisition Parameters  
Date\_ 20100325  
Time 15.59  
INSTRUM av300  
PROBHD 5 mm Multinuc1  
PULPROG zg  
TD 32768  
SOLVENT CDCl3  
NS 16  
DS 0  
SWH 5995.204 Hz  
FIDRES 0.182959 Hz  
AQ 2.7329011 sec  
RG 25.4  
DM 83.400 usec  
DE 6.00 usec  
TE 673.2 K  
D1 3.00000000 sec  
MCREST 0.00000000 sec  
MCMRK 0.01500000 sec

===== CHANNEL f1 =====  
NUC1 1H  
P1 12.30 usec  
PL1 2.00 dB  
SFO1 300.1718010 MHz

F2 - Processing parameters  
SI 16384  
SF 300.1700051 MHz  
WDW EM  
SSB 0  
LB 1.00 Hz  
GB 0  
PC 1.00

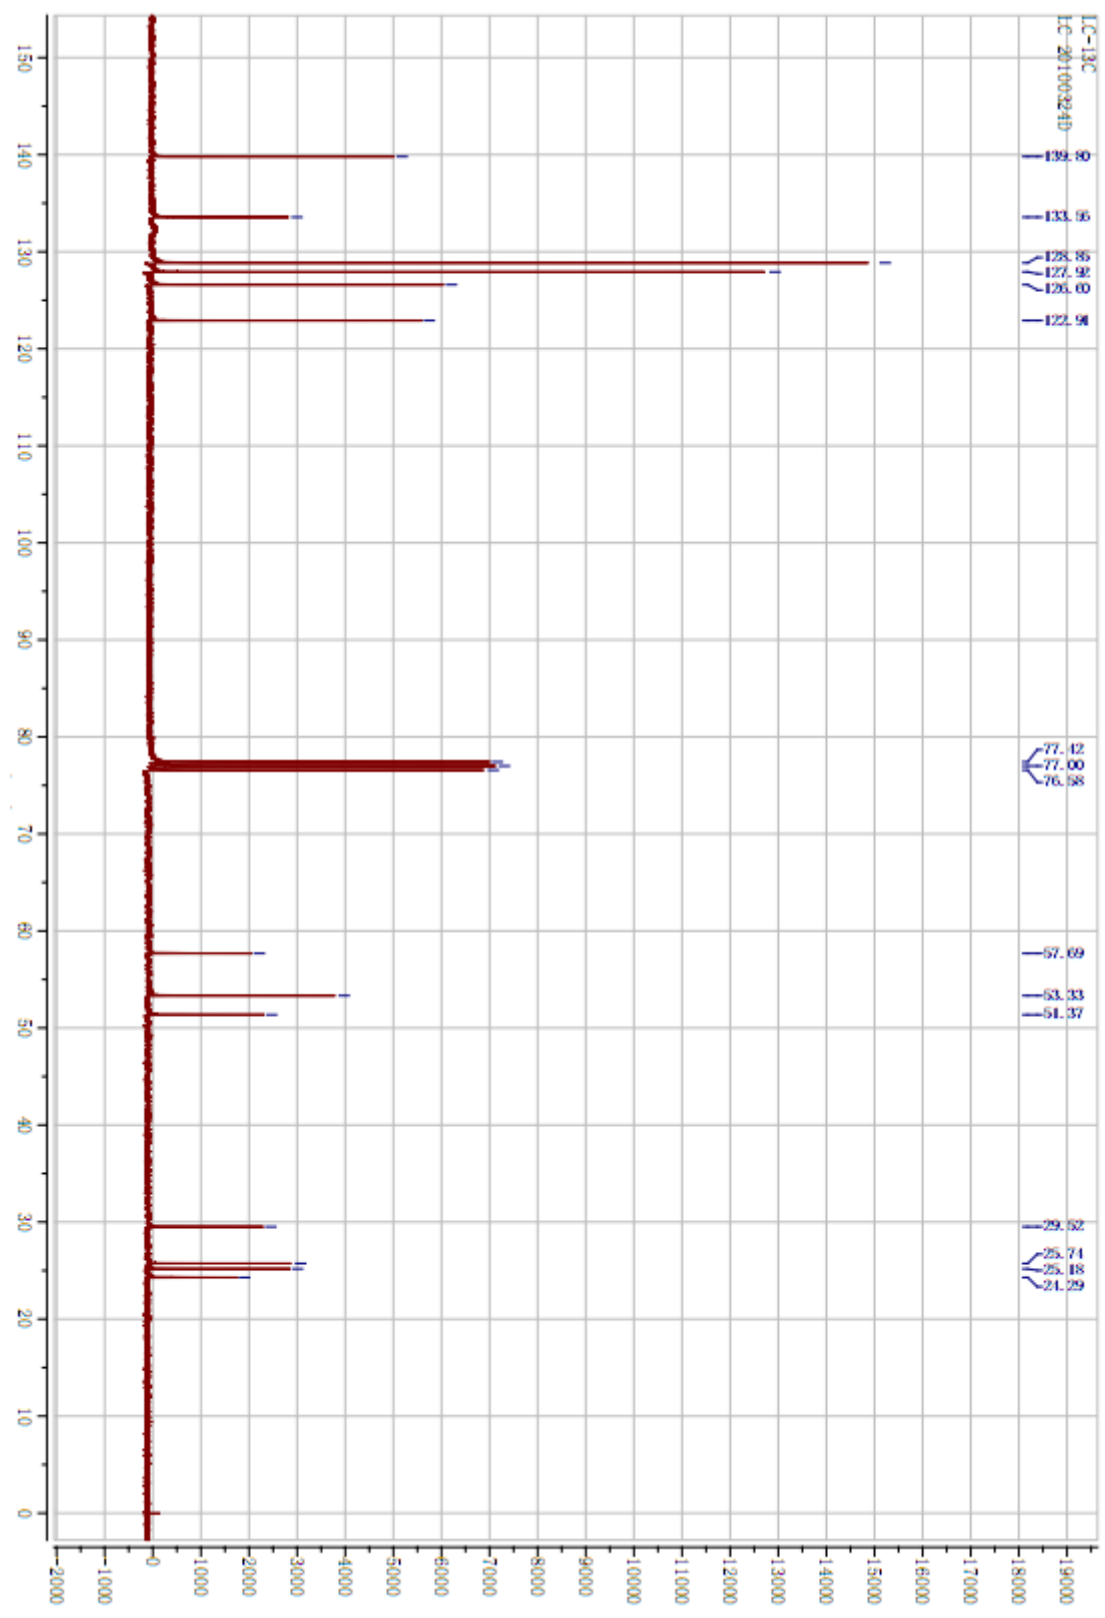

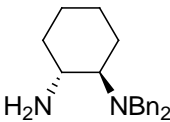

(1*R*,2*R*)-*N,N*-Dibenzyl-1,2-diaminocyclohexane (**1a**)

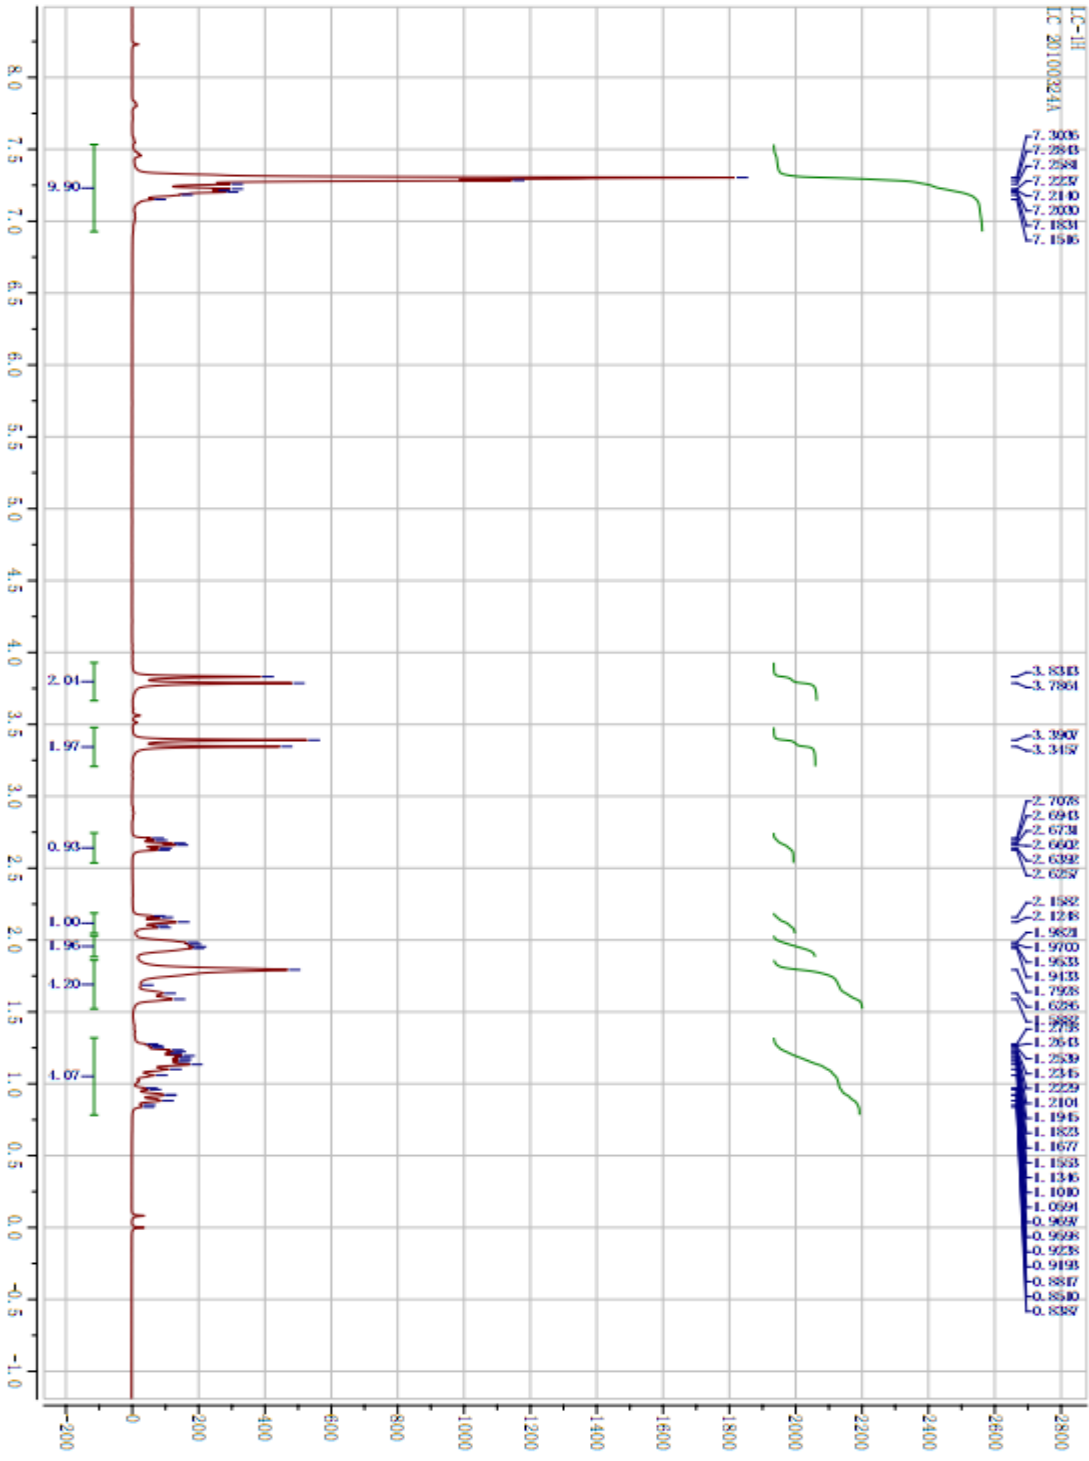

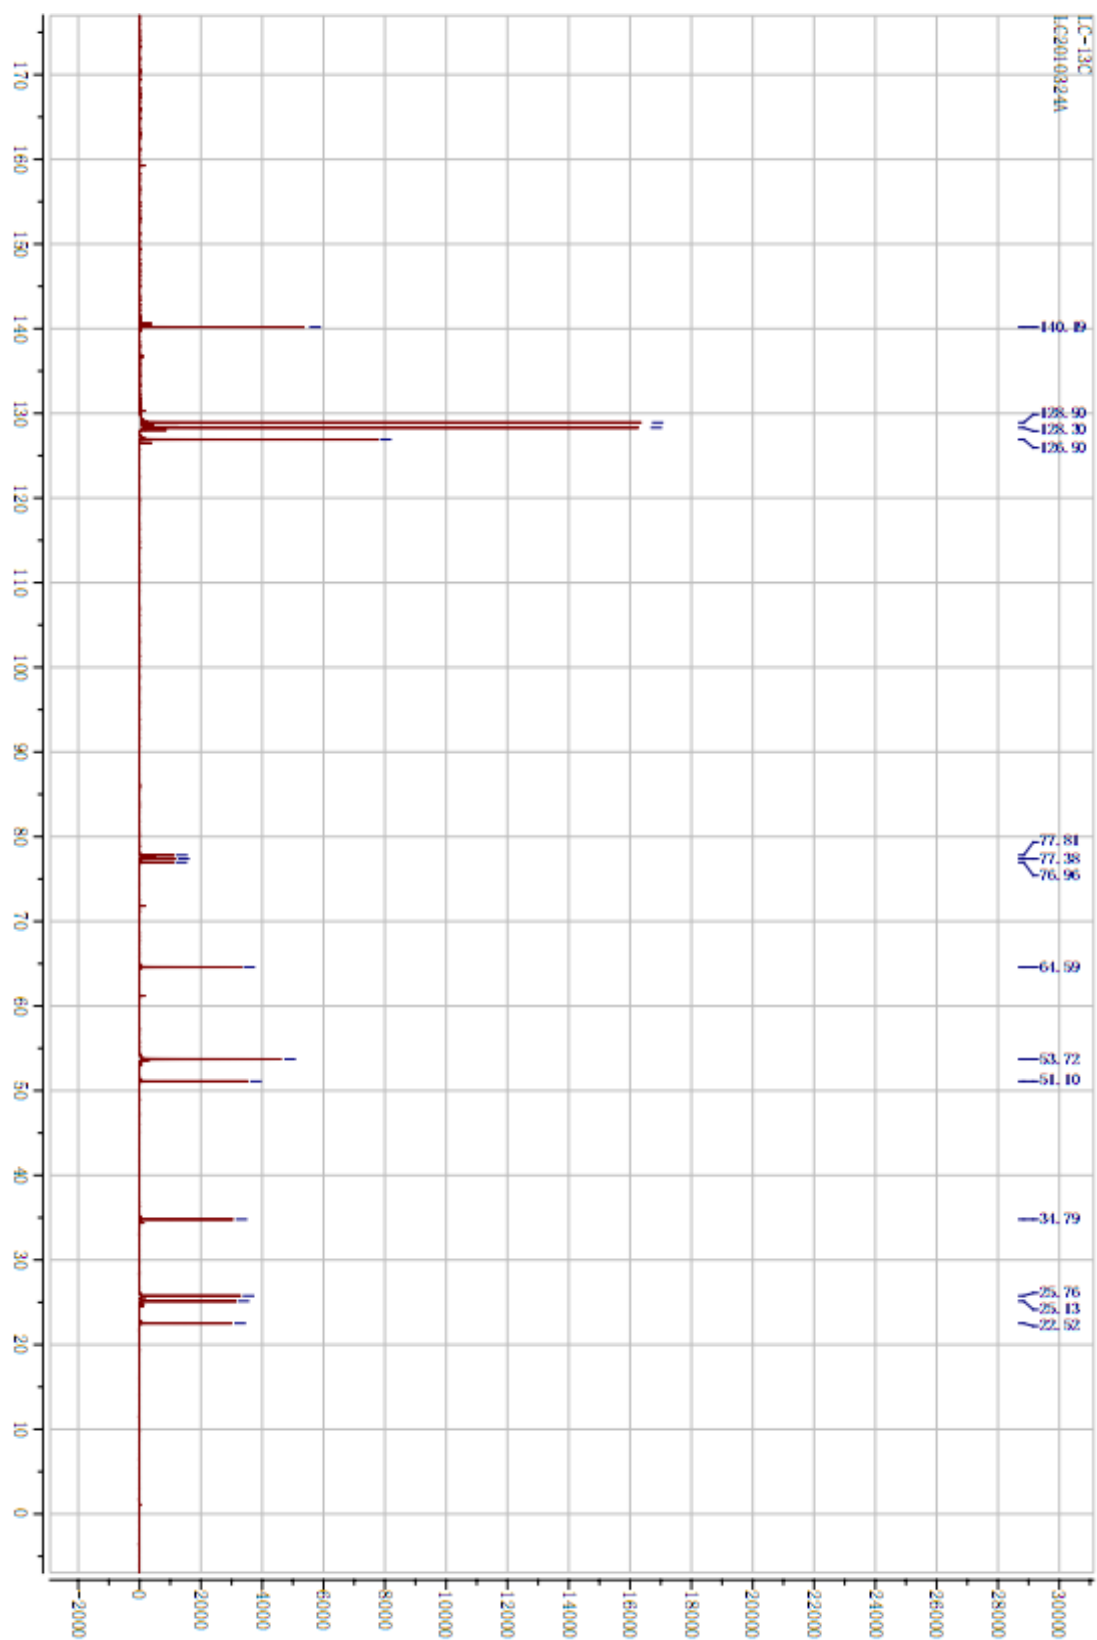

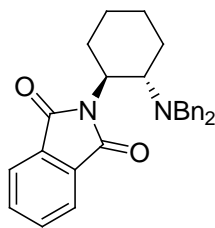

(1*S*,2*S*)-*N,N*-Dibenzyl-*N'*-phthaloyl-1,2-diaminocyclohexane

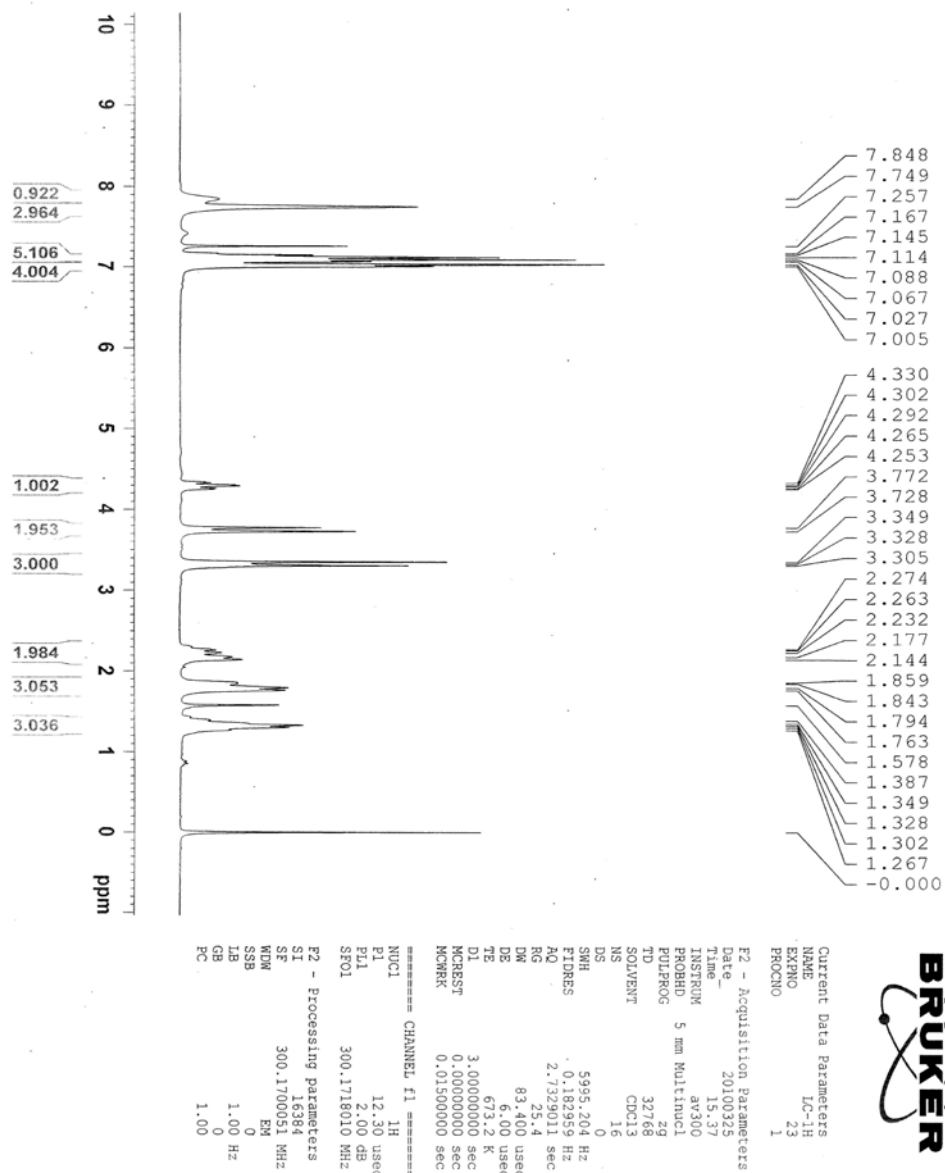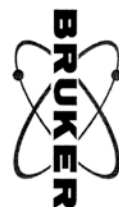



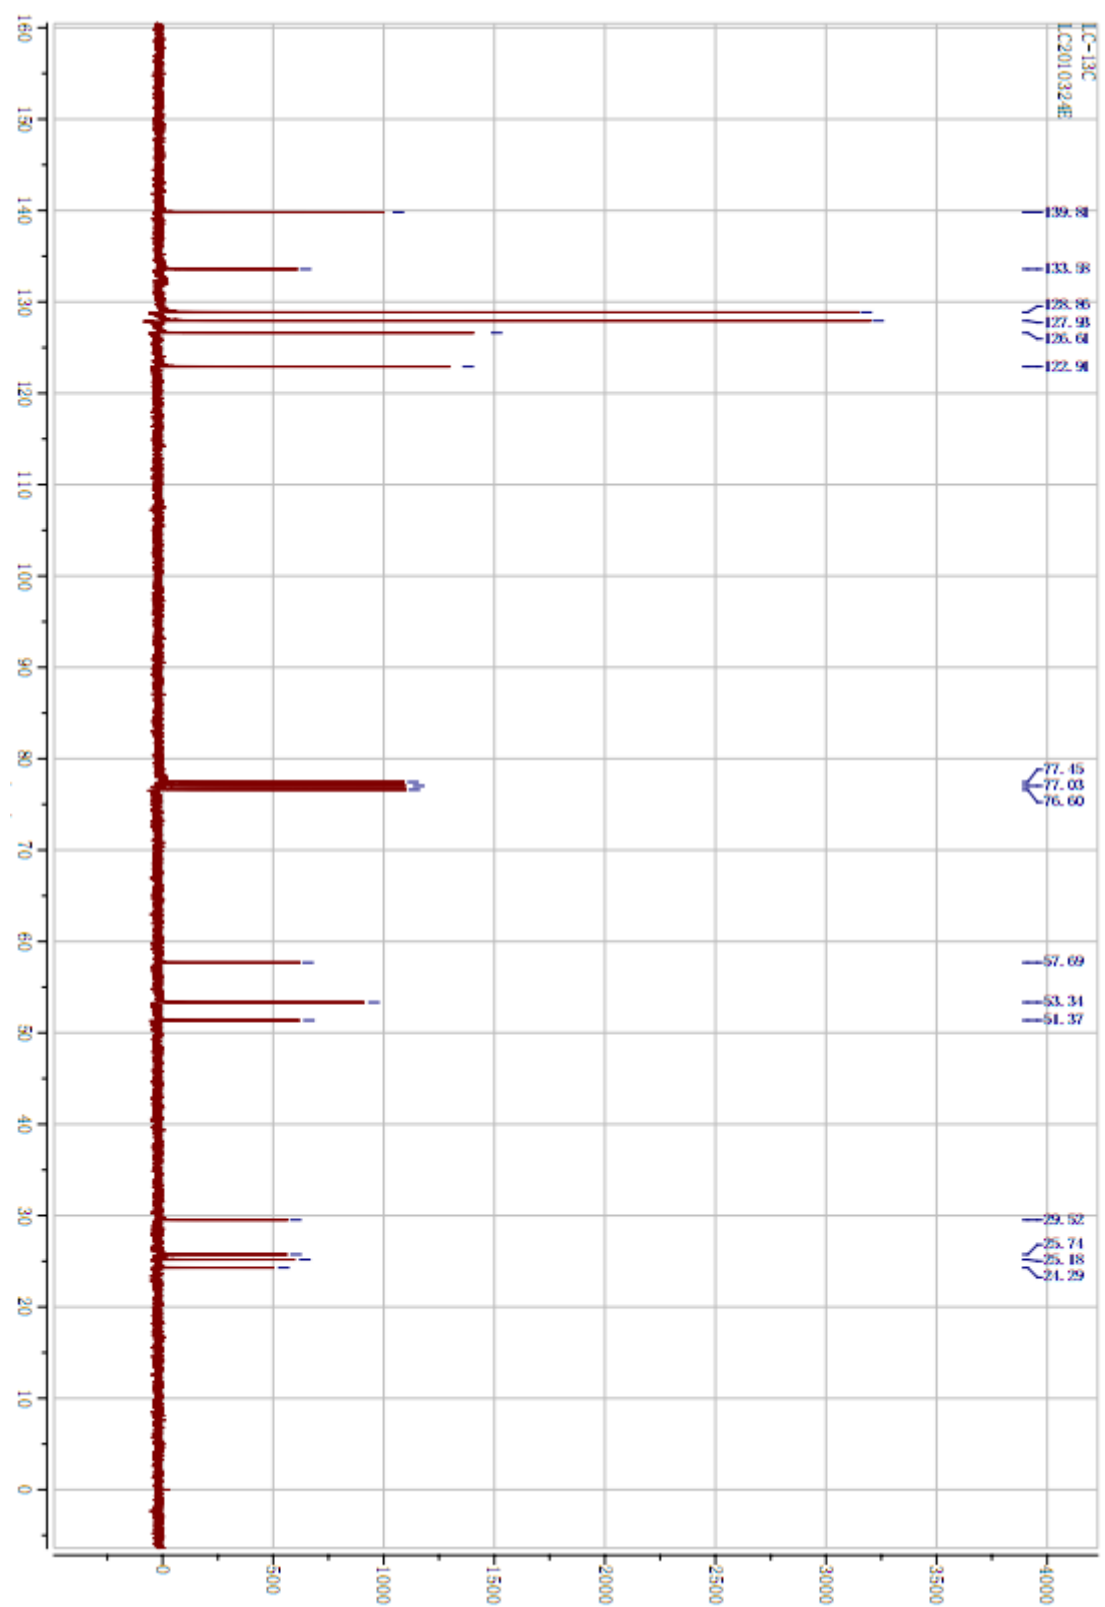

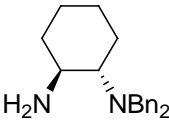

(1S,2S)-N,N-Dibenzyl-1,2-diaminocyclohexane (**1b**)

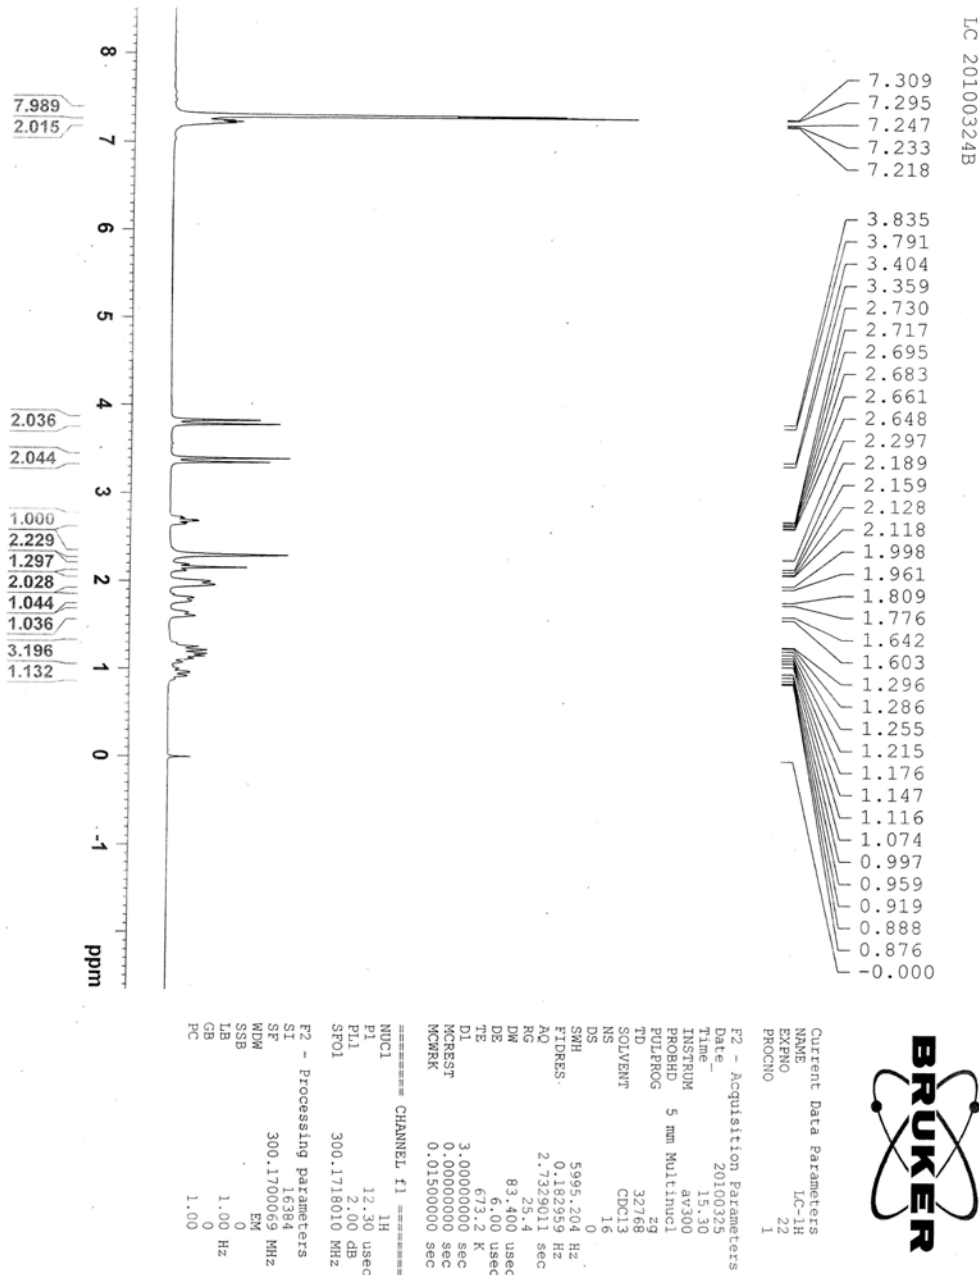

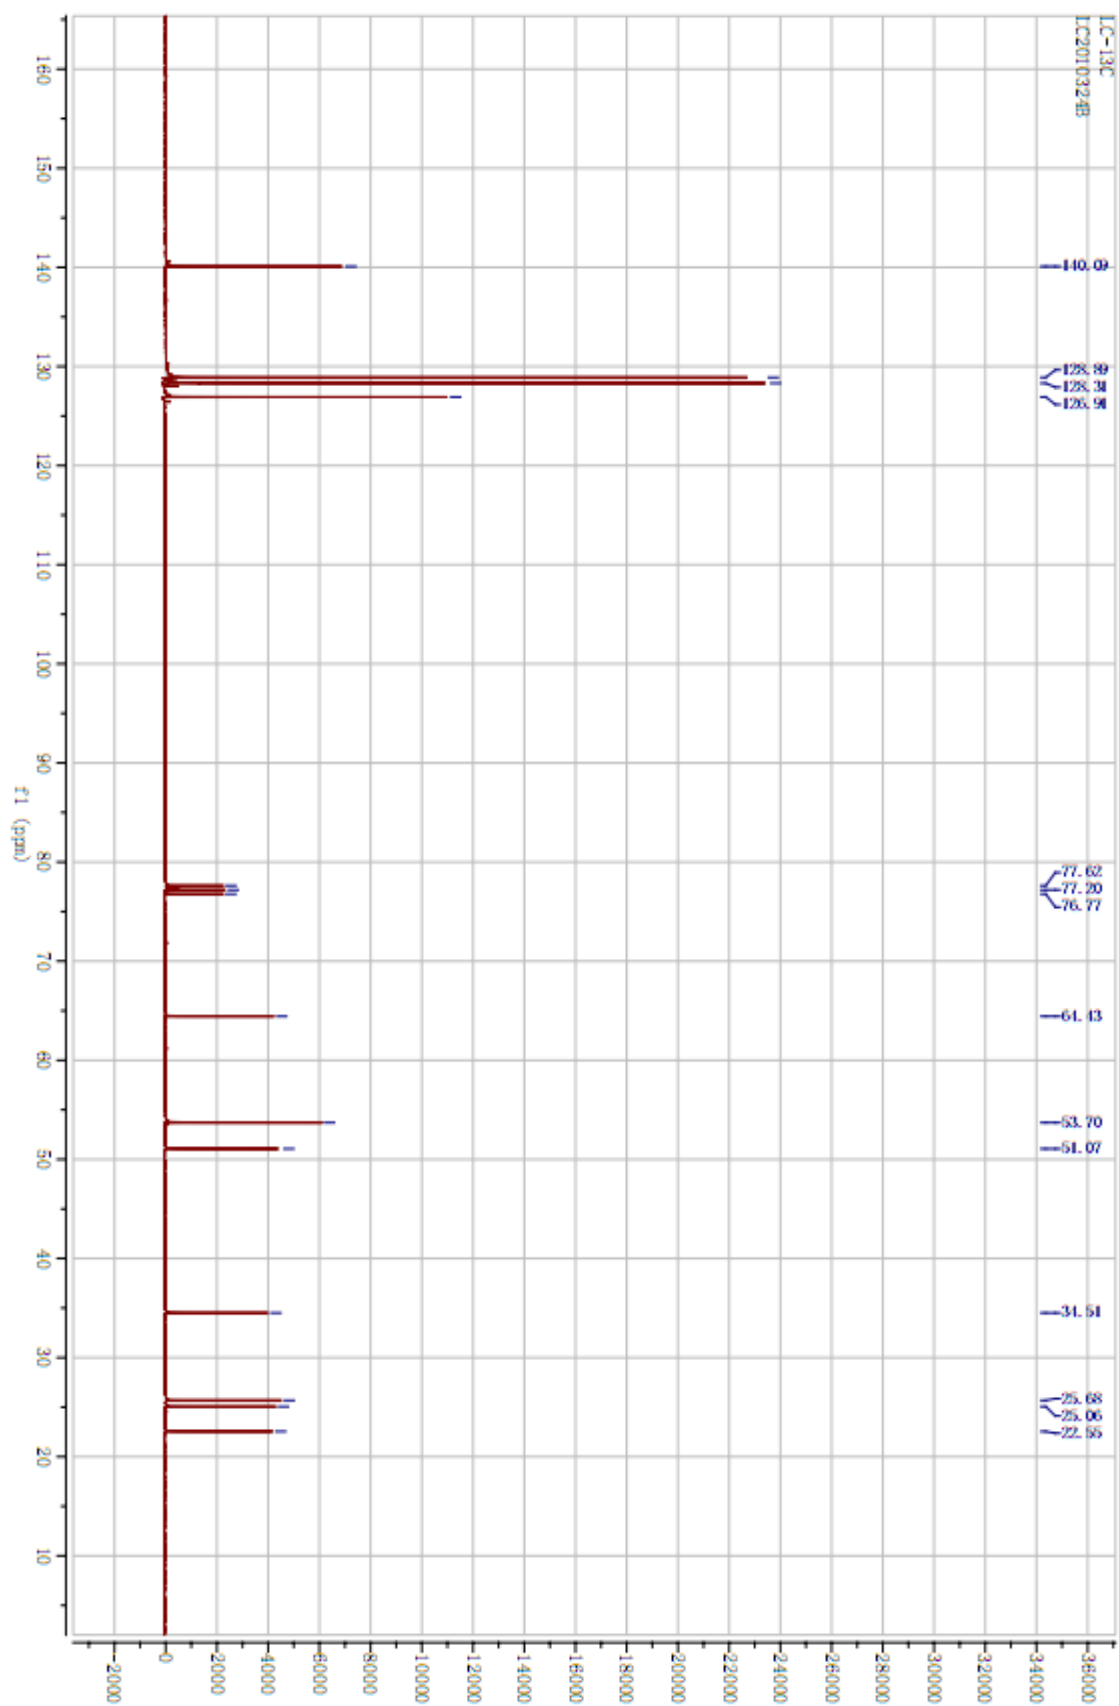

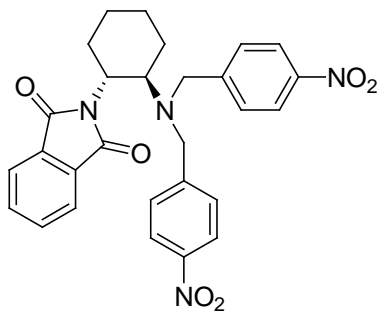

(1R,2R)-N,N-Di(4-nitrobenzyl)-N'-phthaloyl-1,2-diaminocyclohexane

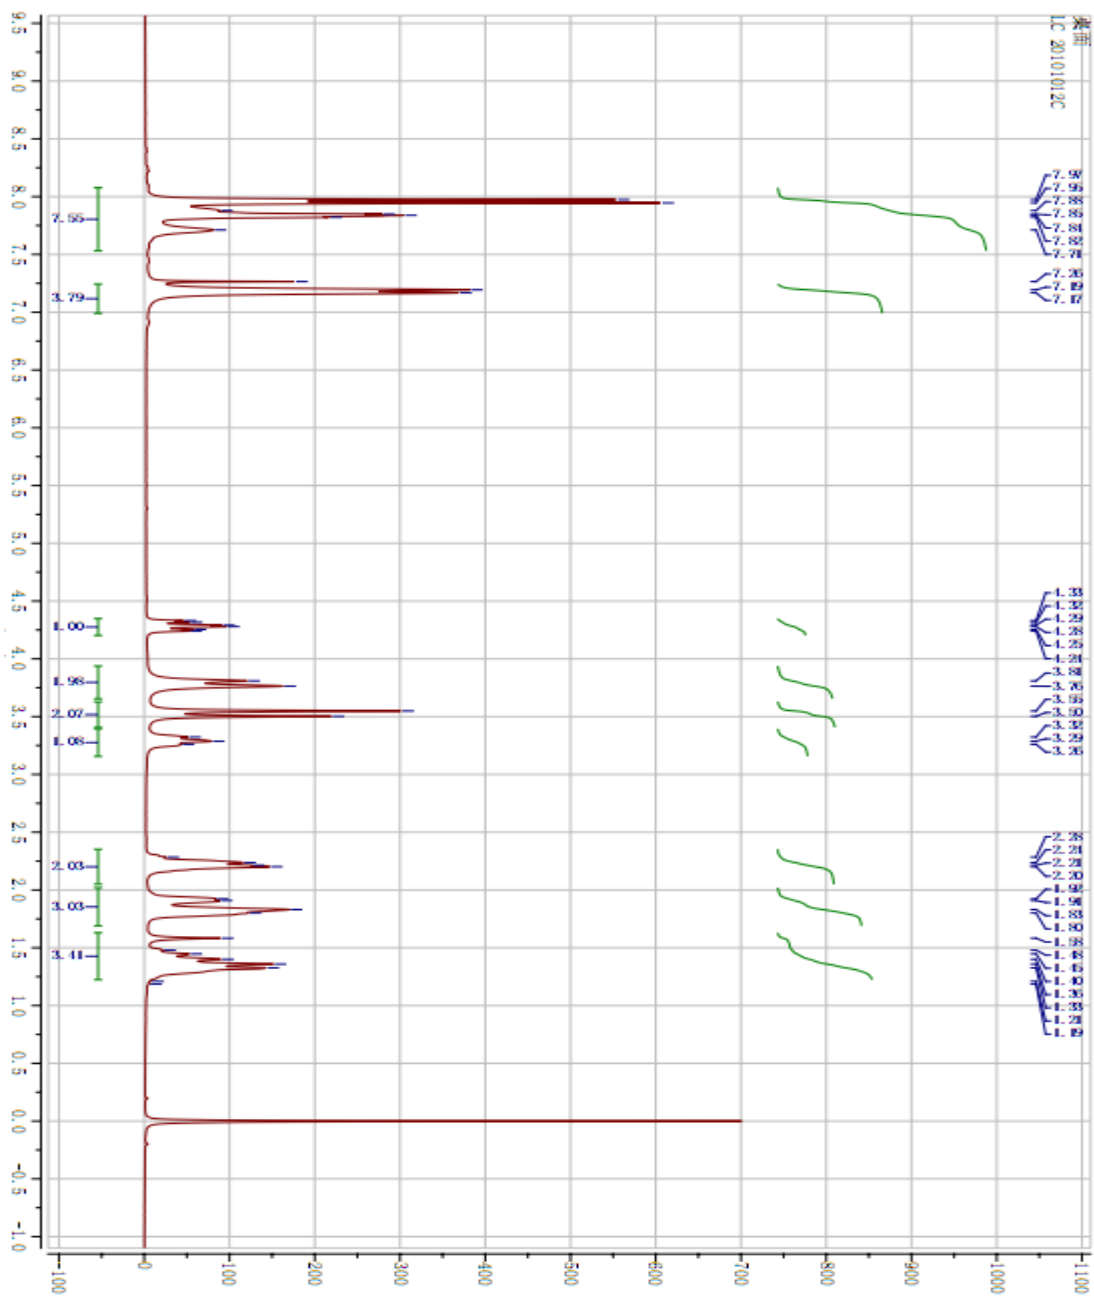

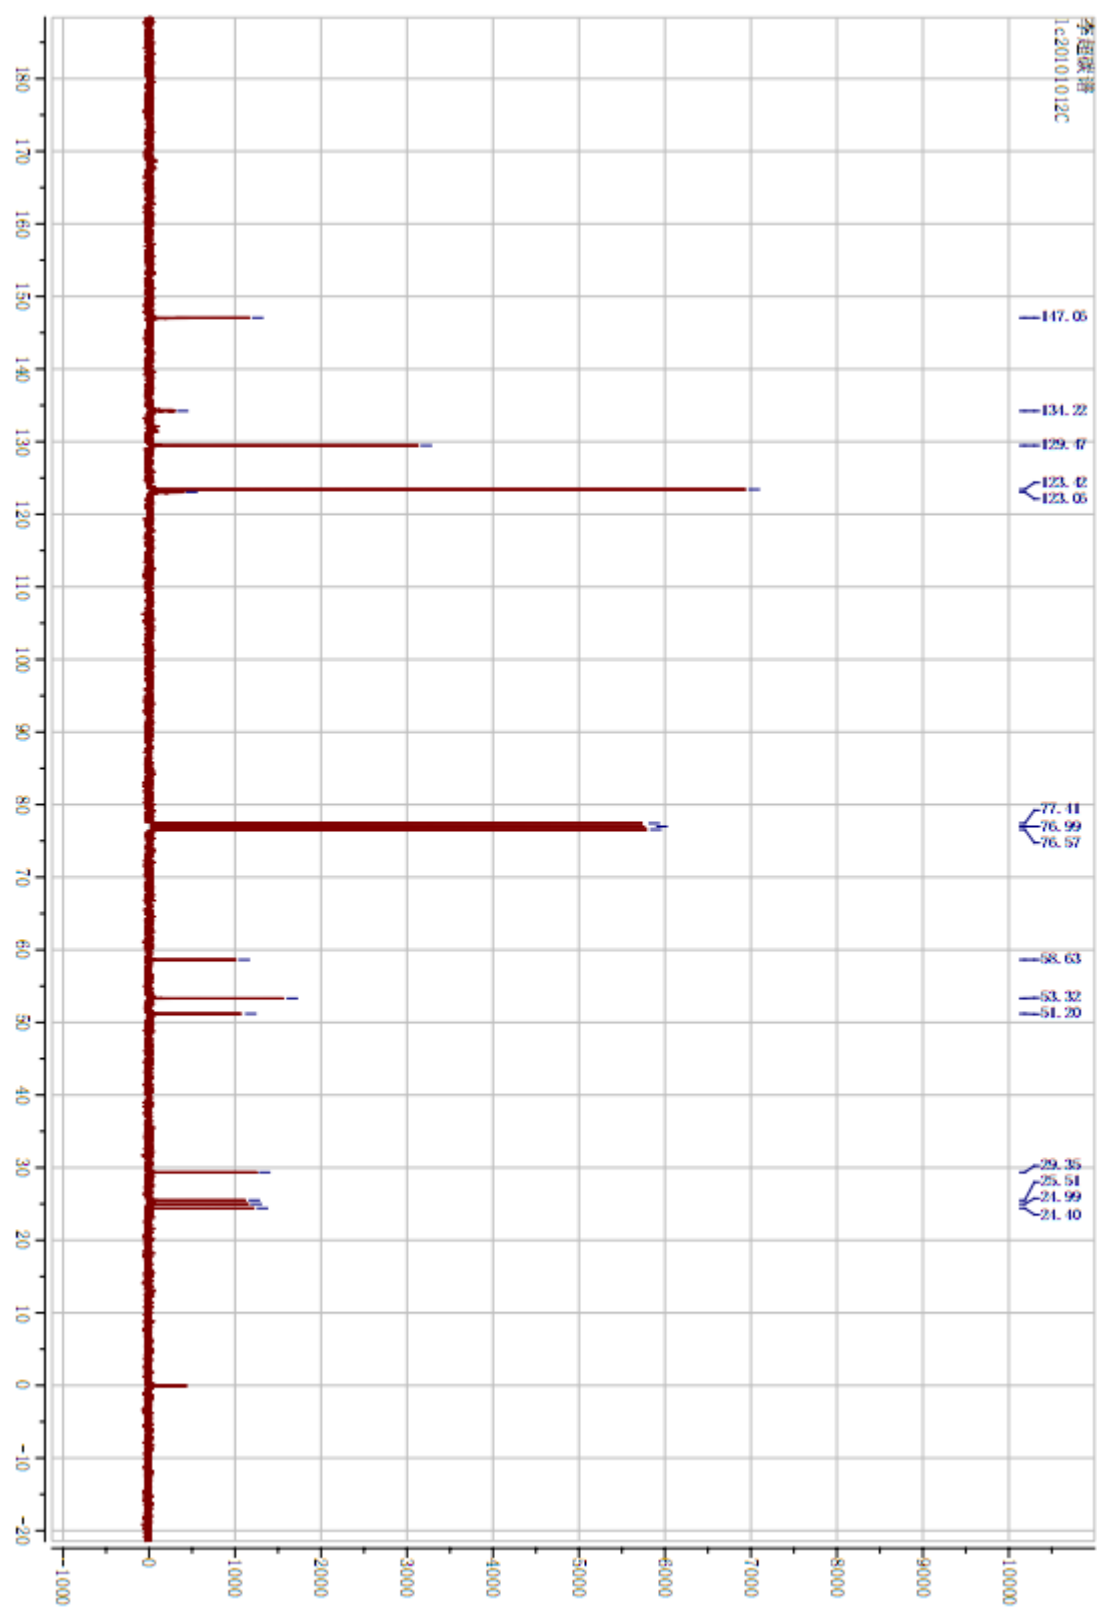

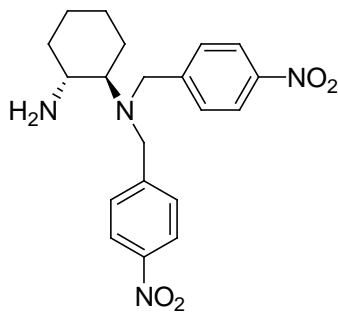

(1R,2R)-N,N-Di(4-nitrobenzyl)-1,2-diaminocyclohexane (**1c**)

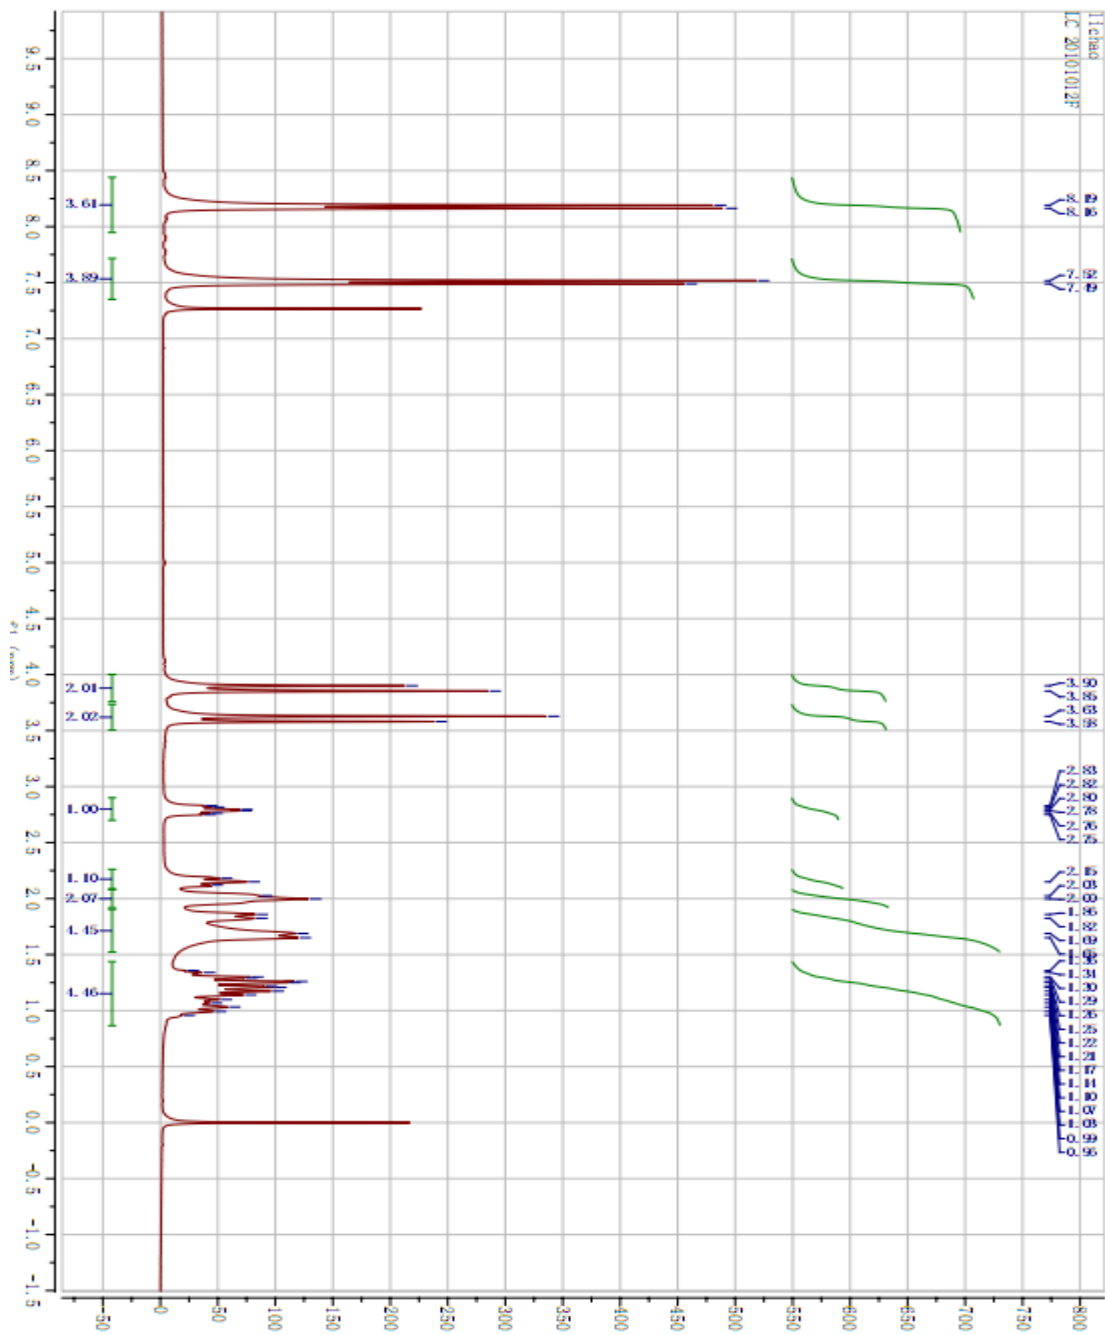

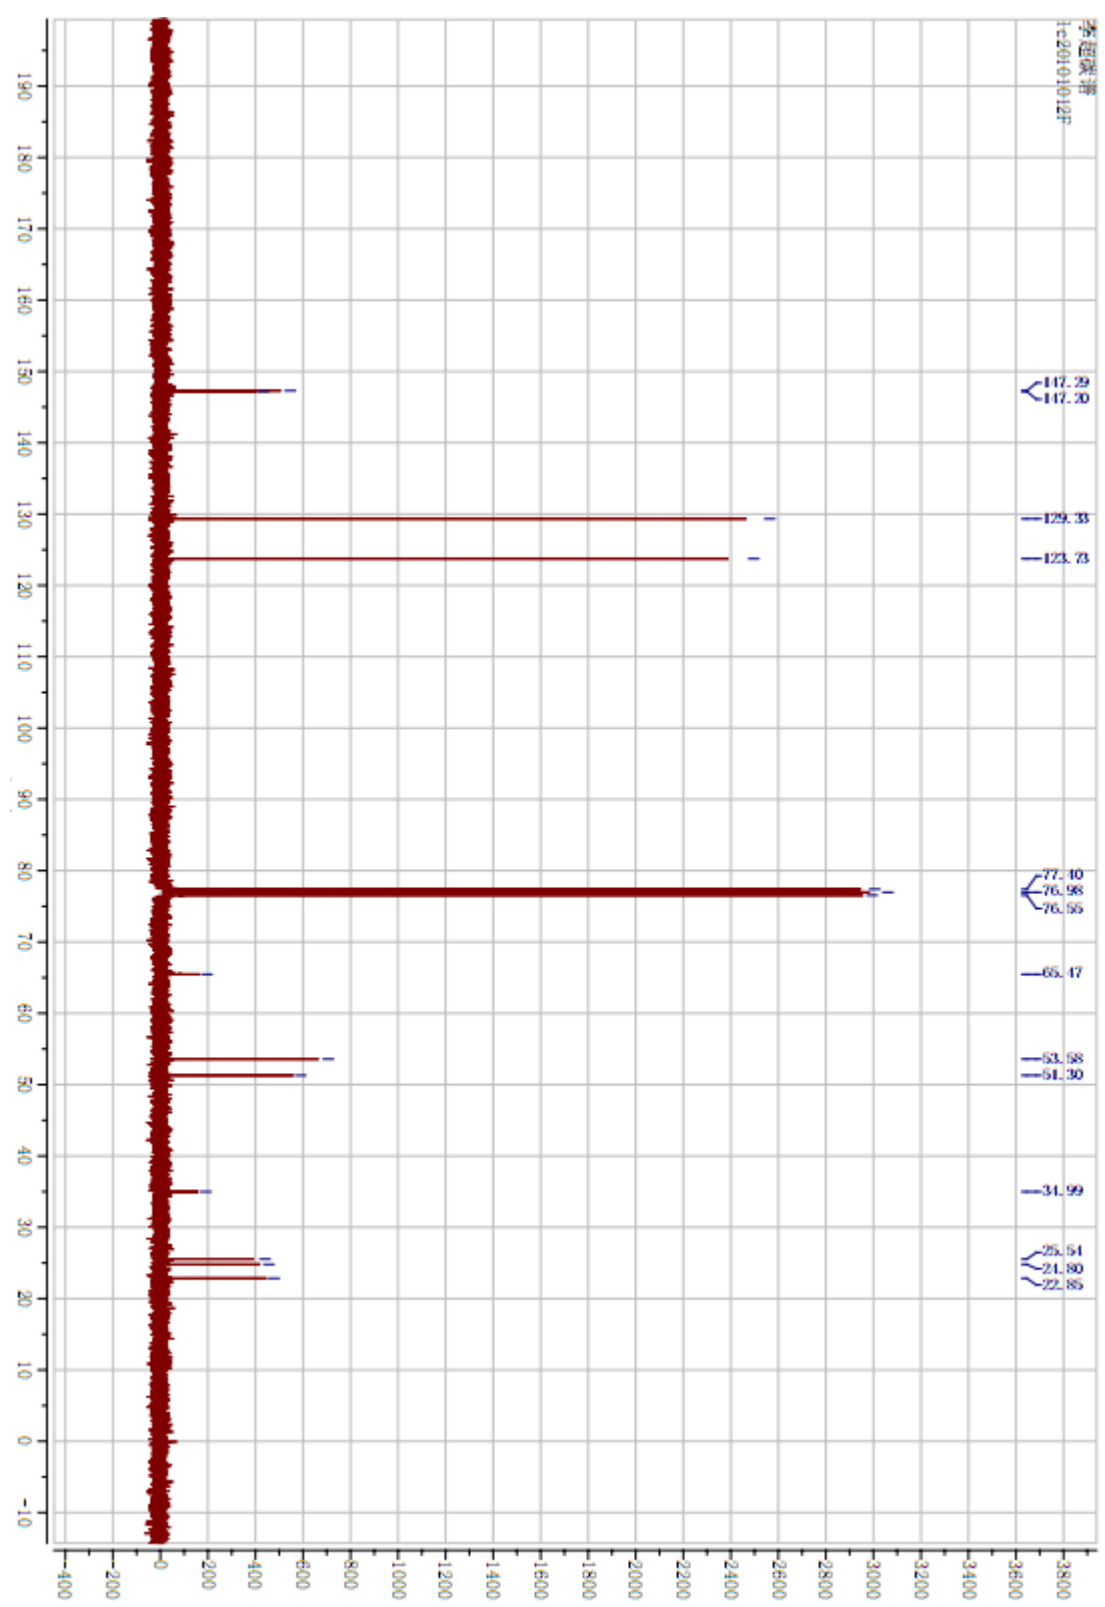

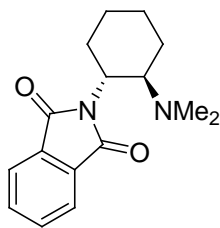

(1R,2R)-N,N-Dimethyl-N'-phthaloyl-1,2-diaminocyclohexane

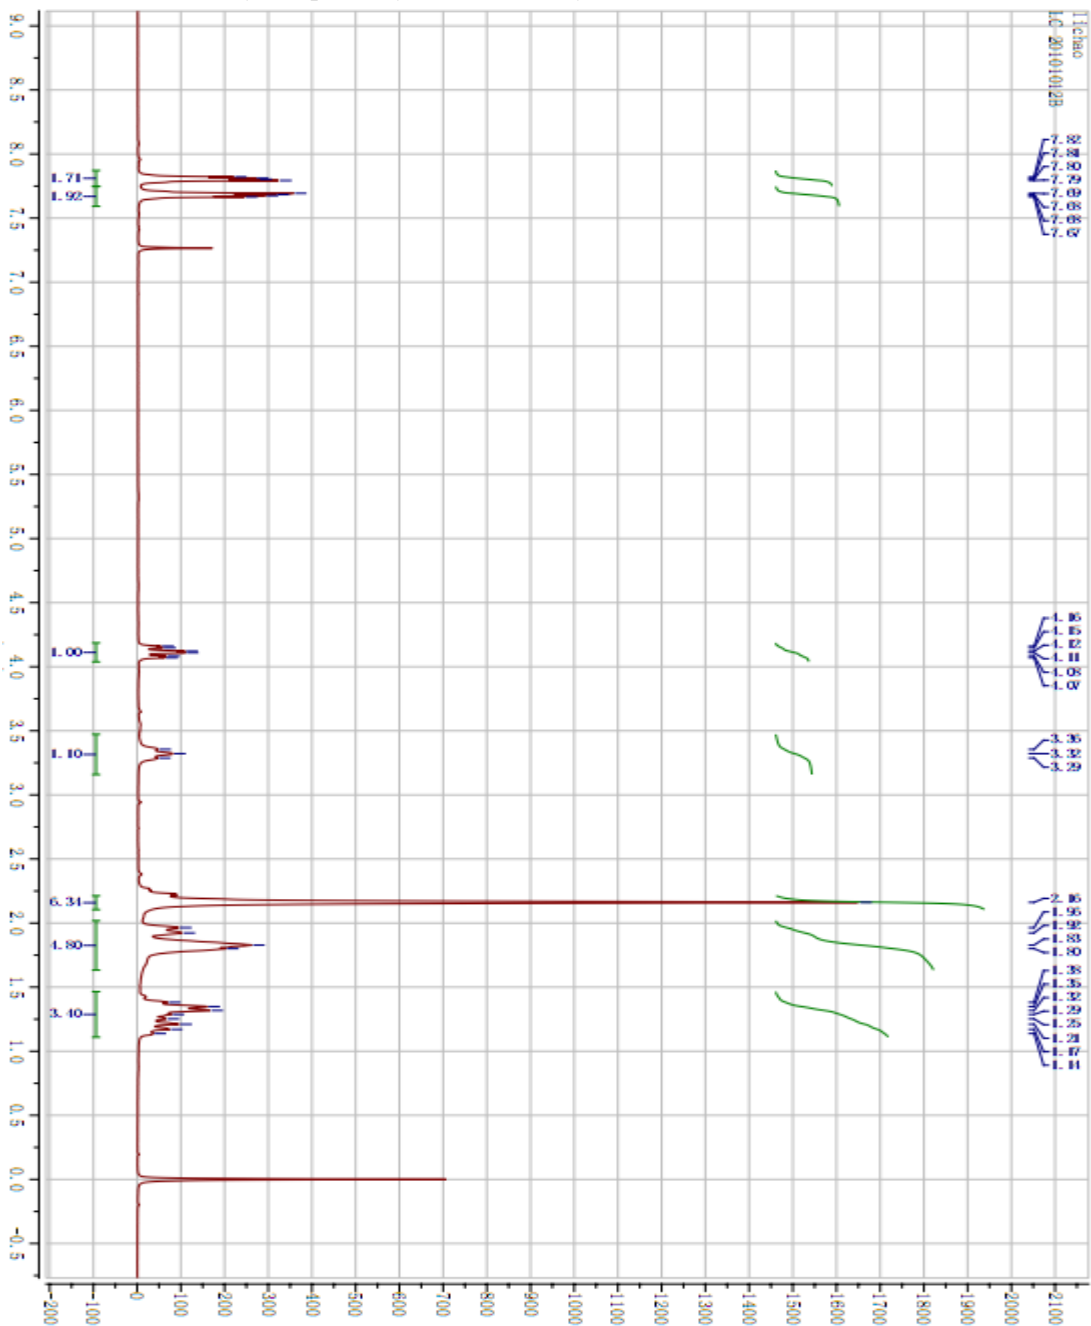



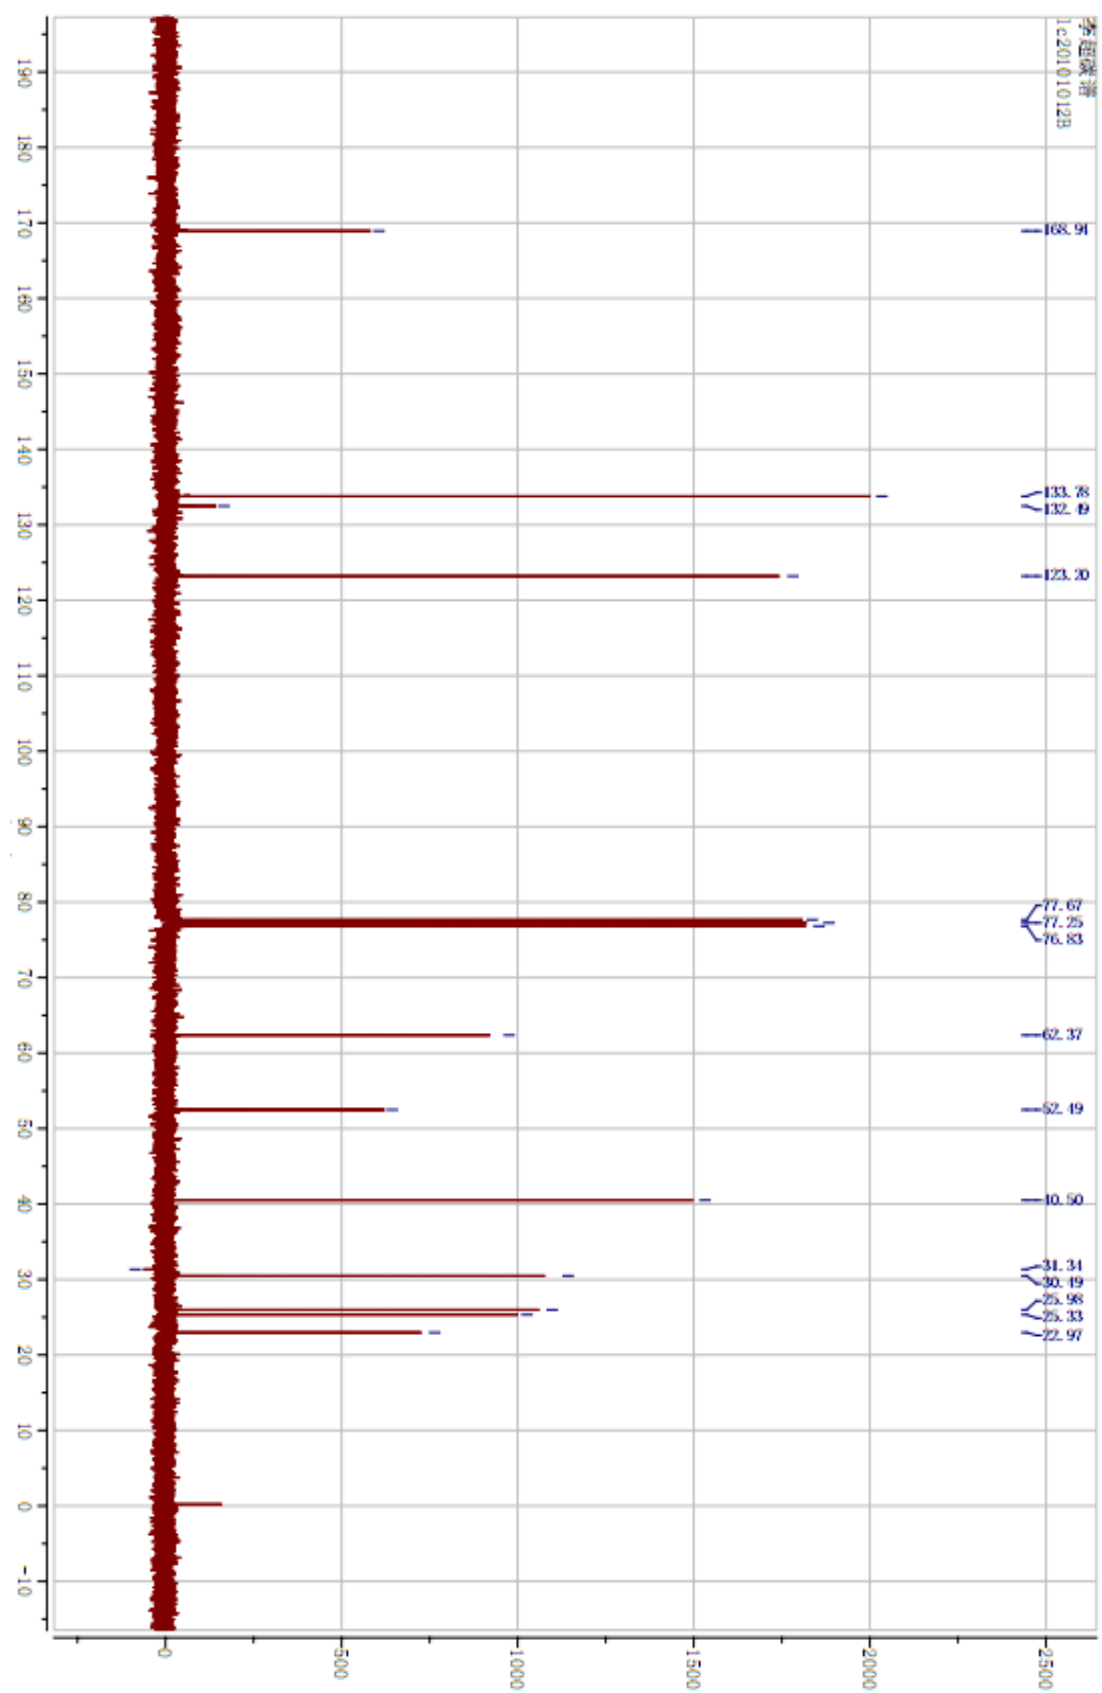

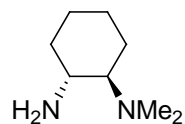

(1R,2R)-N,N- Dimethyl -1,2-diaminocyclohexane (**1d**)

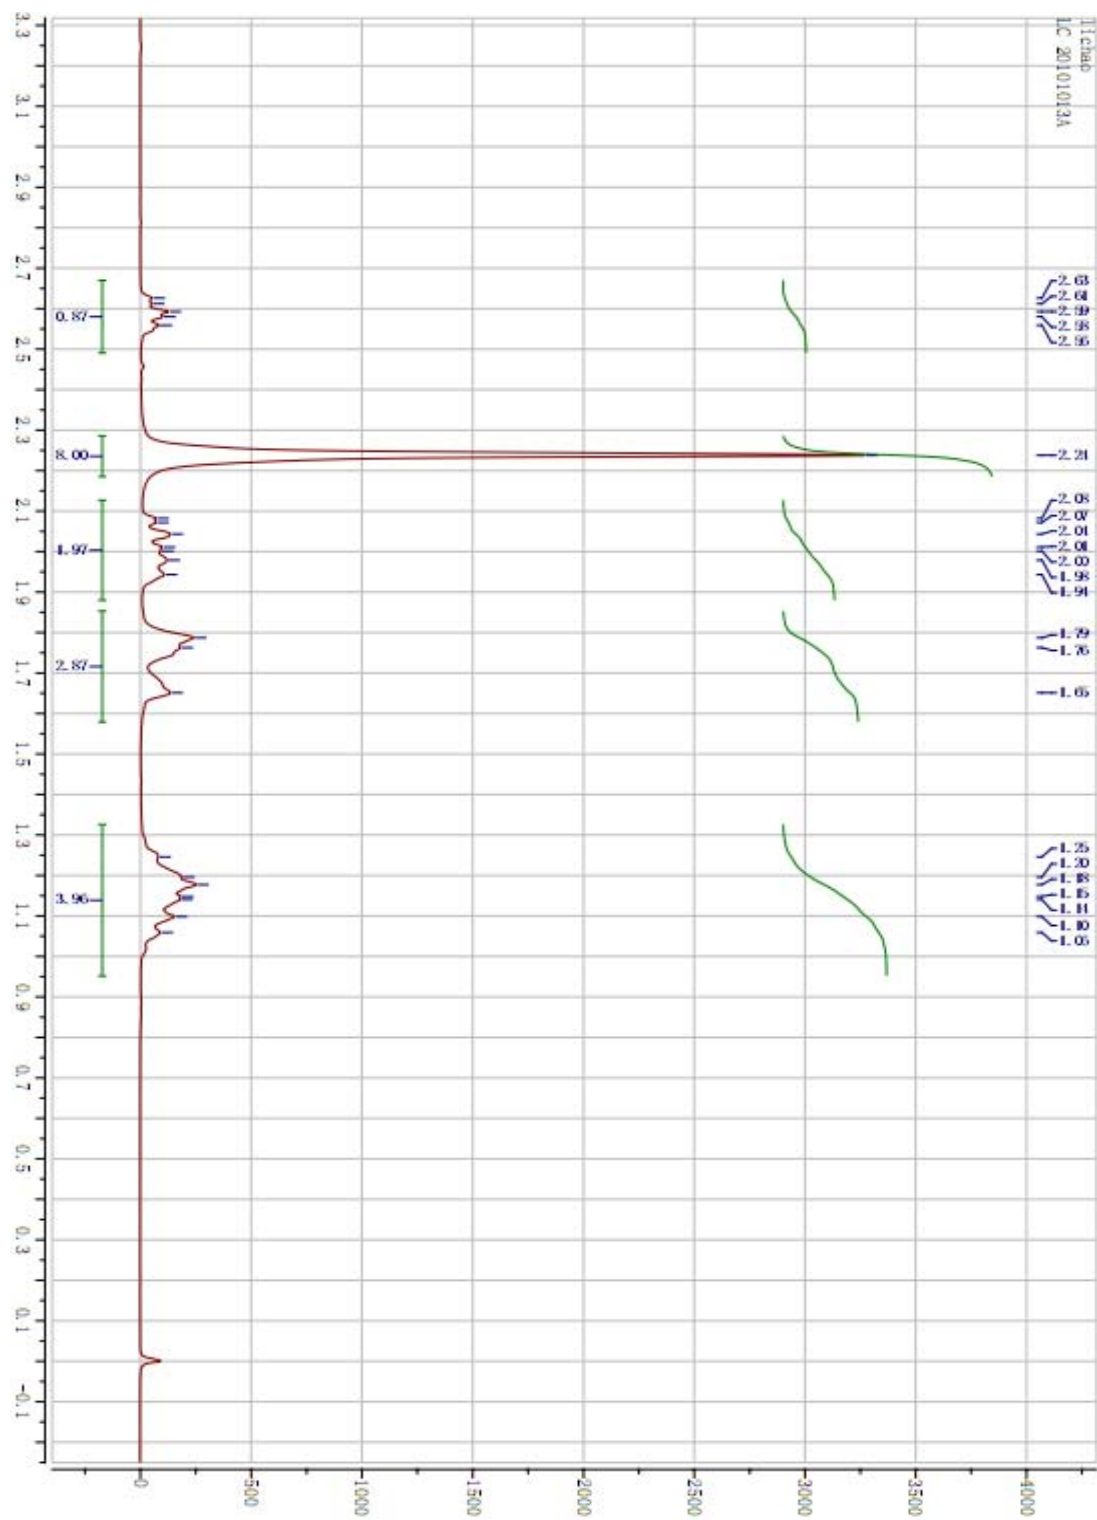

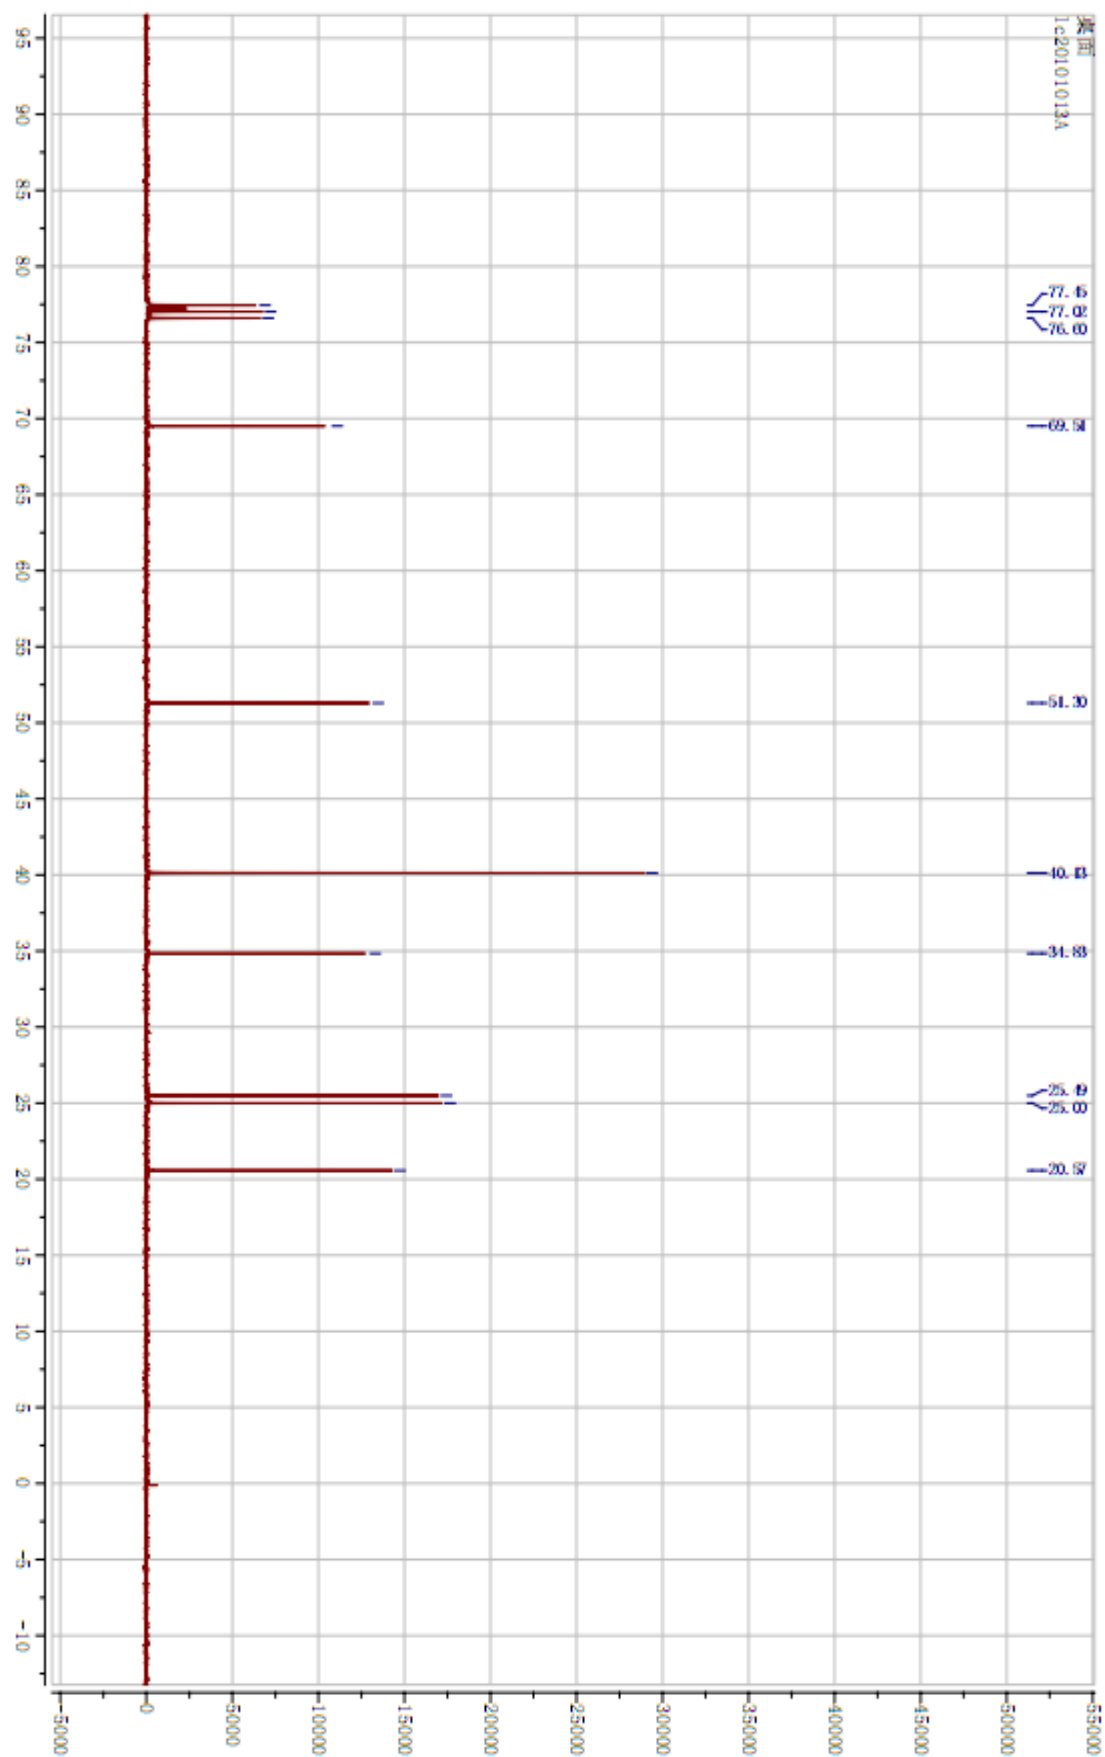

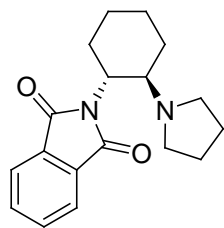

2-((1R,2R)-2-(Pyrrolidin-1-yl)cyclohexyl)isoindoline-1,3-dione

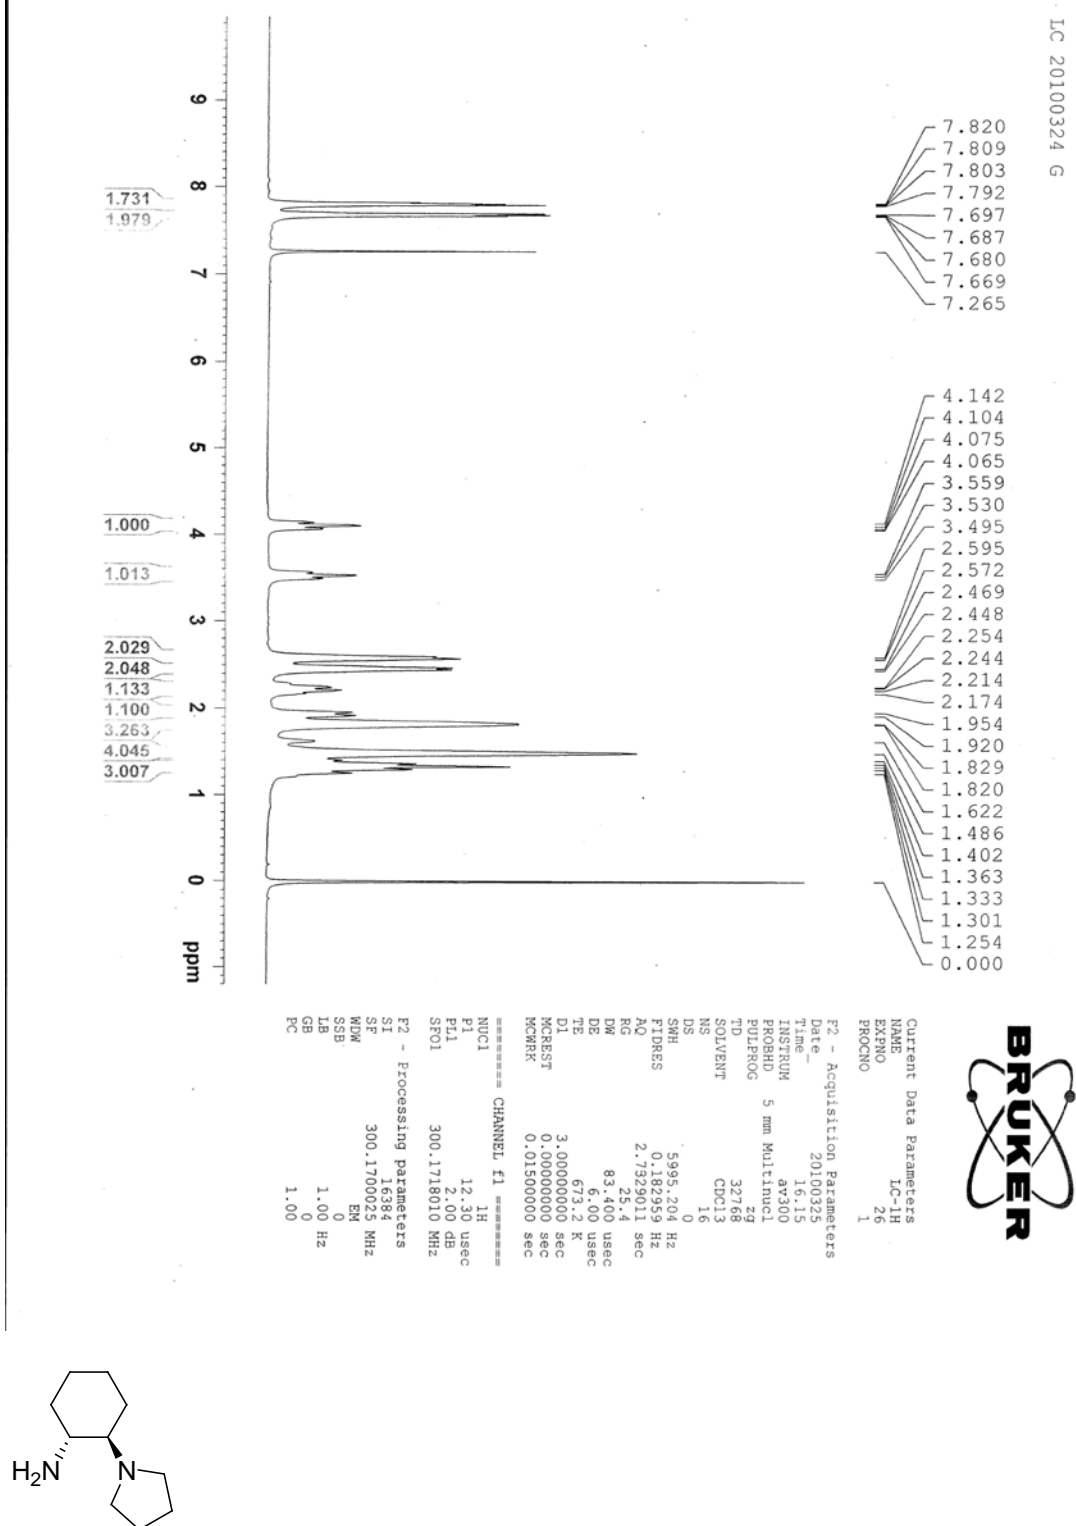

(1R,2R)-2-(Pyrrolidin-1-yl)cyclohexanamine (**1e**)

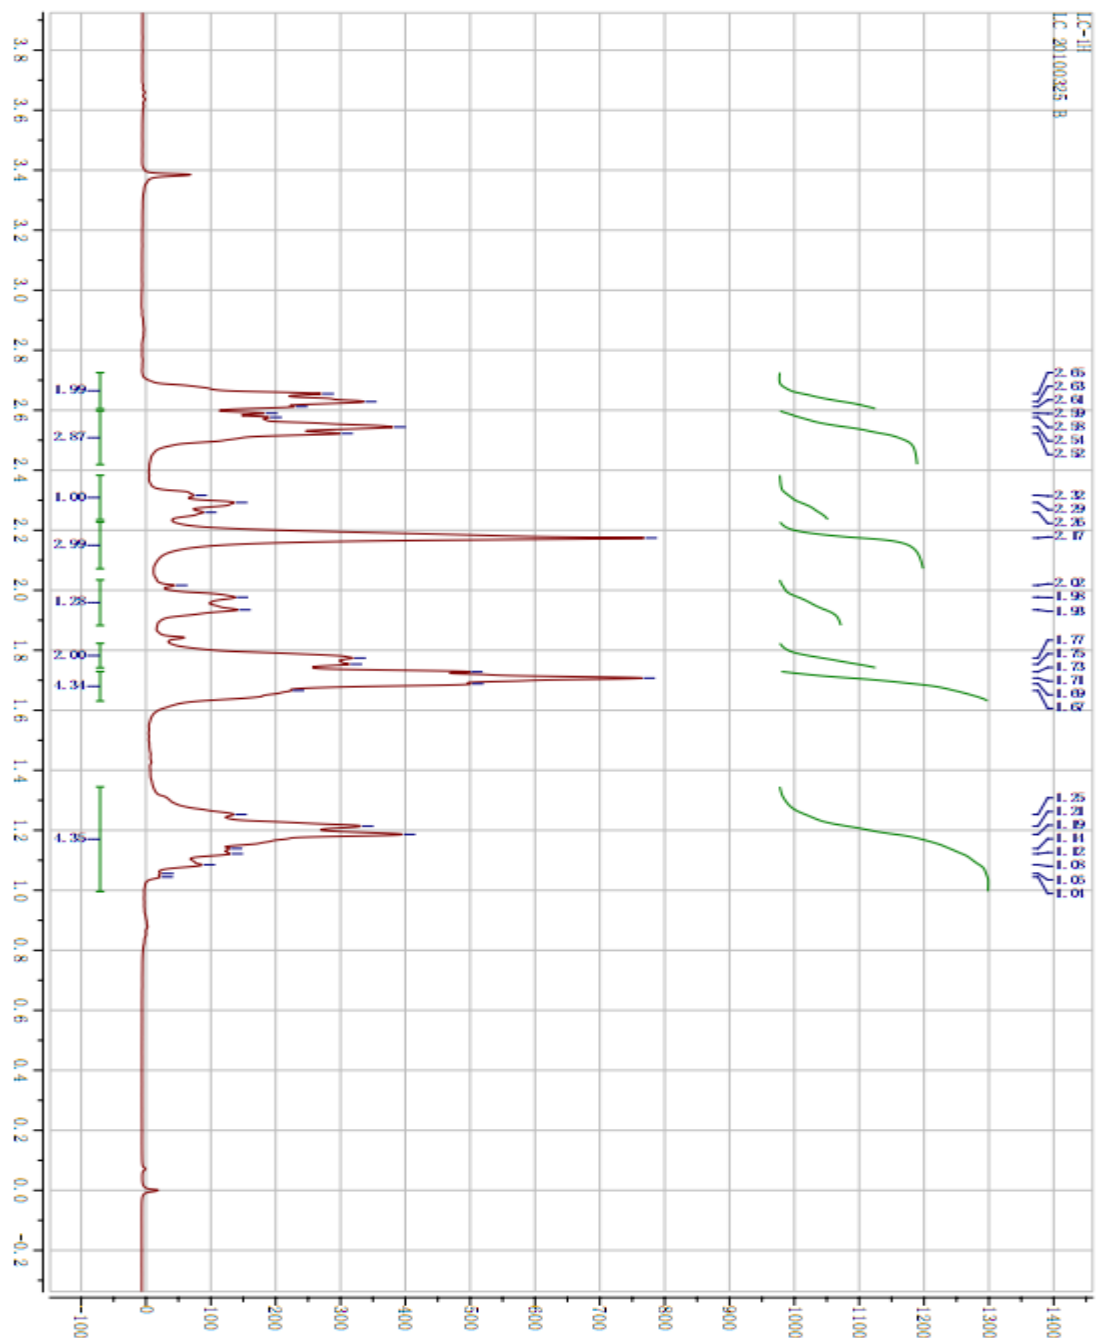

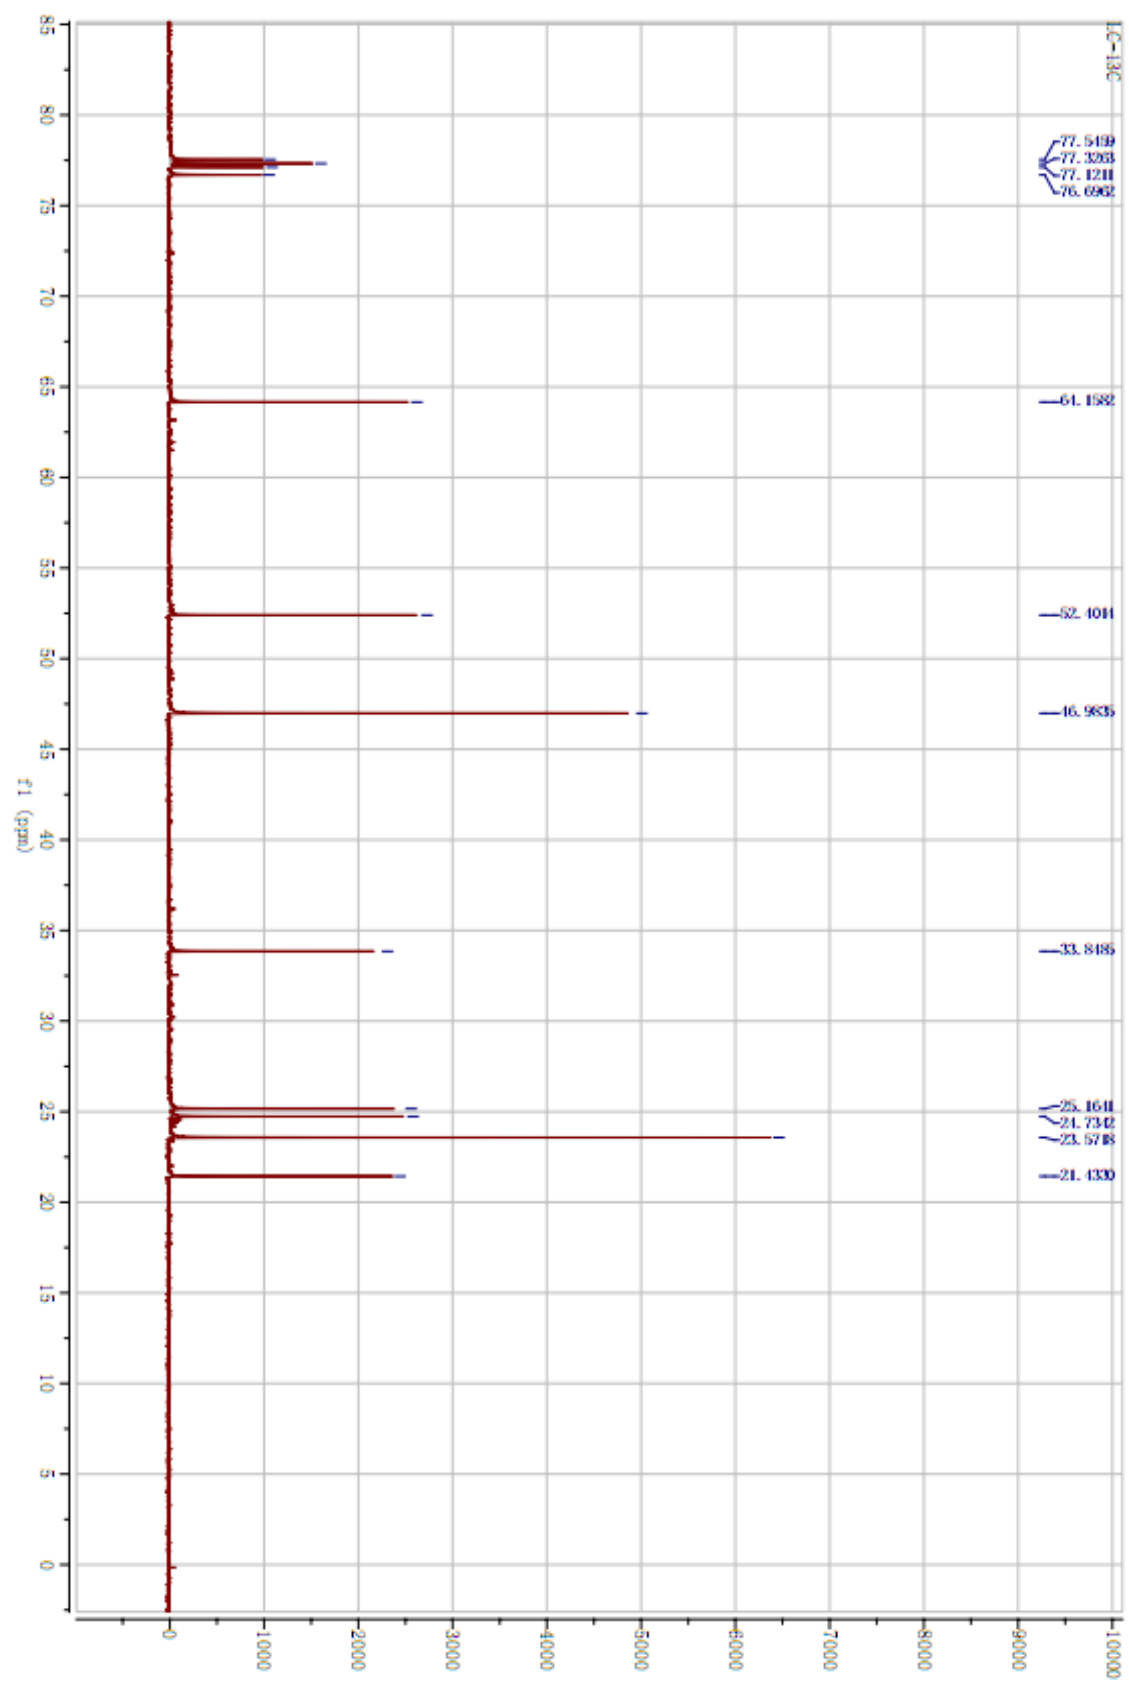

Supplement: c1cy00318f.pdf [file c1cy00318f.pdf]
